# Supplementary material
Source: HighWire-hosted journal article supplement (https://erj.ersjournals.com/content/58/1/2004314)
Supplement: inline-supplementary-material-1 [file inline-supplementary-material-1.pdf]

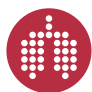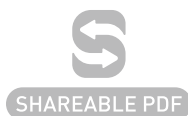

# Spatial transcriptomics for respiratory research and medicine

Sandra Curras-Alonso<sup>1,2</sup>, Juliette Soulier<sup>1</sup>, Thomas Walter<sup>3,4,5</sup>, Florian Mueller<sup>6,7</sup>,  
Arturo Londoño-Vallejo<sup>1,8</sup> and Charles Fouillade<sup>1,8</sup>

<sup>1</sup>Institut Curie, CNRS UMR 3244, PSL Research University, Paris Cedex 05, France. <sup>2</sup>Institut Curie, Inserm U1021-CNRS UMR 3347, University Paris-Saclay, PSL Research University, Centre Universitaire, Orsay Cedex, France. <sup>3</sup>Centre for Computational Biology (CBIO), MINES ParisTech, PSL University, Paris Cedex 06, France. <sup>4</sup>Institut Curie, Paris Cedex, France. <sup>5</sup>INSERM, U900, Paris Cedex, France. <sup>6</sup>Unité Imagerie et Modélisation, Institut Pasteur and CNRS UMR 3691, Paris, France. <sup>7</sup>C3BI, USR 3756 IP CNRS, Paris, France. <sup>8</sup>A. Londoño-Vallejo and C. Fouillade contributed equally to this article as lead authors and supervised the work.

Corresponding author: Charles Fouillade ([charles.fouillade@curie.fr](mailto:charles.fouillade@curie.fr))

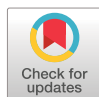

Shareable abstract (@ERSpublications)

In combination with scRNA-seq, spatial transcriptomics have the potential to lead to an unprecedented view of lung architecture at the single cell level, providing original information on lung physiology and physiopathology <https://bit.ly/3uDYir0>

**Cite this article as:** Curras-Alonso S, Soulier J, Walter T, et al. Spatial transcriptomics for respiratory research and medicine. *Eur Respir J* 2021; 58: 2004314 [DOI: 10.1183/13993003.04314-2020].

This single-page version can be shared freely online.

Copyright ©The authors 2021. For reproduction rights and permissions contact [permissions@ersnet.org](mailto:permissions@ersnet.org)

Received: 24 Nov 2020  
Accepted: 29 March 2021

Recent developments in single-cell technologies, and particularly single cell RNA sequencing (scRNA-seq), have provided invaluable tools to decipher complex biological systems like the lung. In the respiratory system, scRNA-seq analyses have led to the discovery of new cell types, such as ionocytes, as well as to a refined classification of the cells composing the lung [1–4]. Profiling of more than 300 000 cells from patients suffering lung pathologies, such as idiopathic pulmonary fibrosis (IPF), has allowed to identify new sub-populations of aberrant basal and endothelial cells that are specific to IPF [5]. Furthermore, collective efforts such as the Human Cell Atlas, aiming at characterising all cells in the human body at the molecular and spatial levels, have flagged the lung as a priority organ [6]. Ongoing efforts are now directed towards the development of spatial transcriptomic techniques allowing identification of cell localisation and description of prevailing cell–cell interactions in the organ in order to define a physiological cell atlas. Although technologies able to sequence *in situ* the transcriptome of individual cells are rapidly emerging, they still lack the resolution required to depict the extreme cell heterogeneity that characterises the anatomy of the lung. This article will present an overview of the different spatial transcriptomic methodologies that could be applied to the lung, as well as their potential impact for respiratory research and medicine.
